S1 Table. Search strategy conducted in PubMed

| Search #                                   | Search details                                                                                                             |
|--------------------------------------------|----------------------------------------------------------------------------------------------------------------------------|
| <b>COMPONENT 1. MENTAL DISORDERS:</b>      |                                                                                                                            |
| #1                                         | Depressive Disorder[Mesh:noexp]                                                                                            |
| #2                                         | depression                                                                                                                 |
| #3                                         | Anxiety[Mesh:noexp]                                                                                                        |
| #4                                         | Anxiety disorders[Mesh:noexp]                                                                                              |
| #5                                         | Mental disorders[Mesh:noexp]                                                                                               |
| #6                                         | depressive*[Title/Abstract] OR depression*[Title/Abstract] OR anxiety*[Title/Abstract] OR mental disorder*[Title/Abstract] |
| #8                                         | (#1 OR #2 OR #3 OR #4 OR #5 OR #6)                                                                                         |
| <b>COMPONENT 2. SCREENING INSTRUMENTS:</b> |                                                                                                                            |
| #9                                         | "general health questionnaire"[Title/Abstract]                                                                             |
| #10                                        | "Center for Epidemiologic Studies Depression Scale"[Title/Abstract]                                                        |
| #11                                        | "Epidemiologic Studies Depression Scale"[Title/Abstract]                                                                   |
| #12                                        | "GHQ-12"[Title/Abstract] OR "GHQ12"[Title/Abstract]                                                                        |
| #13                                        | "CES-D"[Title/Abstract] OR "CESD"[Title/Abstract]                                                                          |
| #14                                        | screen*[Title/Abstract]                                                                                                    |
| #15                                        | Mass screening[Mesh:noexp]                                                                                                 |
| #16                                        | (#9 OR #10 OR #11 OR #12 OR #13 OR #14 OR #15)                                                                             |

|                                           |                                                                                                                                                    |
|-------------------------------------------|----------------------------------------------------------------------------------------------------------------------------------------------------|
| <b>COMPONENT 3. DIAGNOSTIC ACCURACY :</b> |                                                                                                                                                    |
| #17                                       | (Curve, ROC) OR (Curves, ROC) OR (Analysis, ROC) OR (Analyses, ROC) OR (Receiver Operating Characteristic) OR (Receiver Operating Characteristics) |
| #18                                       | Sensitivity AND Specificity                                                                                                                        |
| #19                                       | Validation*                                                                                                                                        |
| #20                                       | #17 OR #18 OR #19                                                                                                                                  |
| <b>LANGUAGE LIMIT:</b>                    |                                                                                                                                                    |
| #21                                       | "english"[Language] OR "spanish"[Language]                                                                                                         |
| #22                                       | #8 AND #16 AND #20 AND #21                                                                                                                         |
